# Supplementary material for: Fabrication of magnetically responsive core–shell adsorbents for thiophene capture: AgNO3-functionalized Fe3O4@mesoporous SiO2 microspheres
Source: Royal Society of Chemistry journal article supplement (doi:10.1039/c3ta14491g), 2014-01-01
Supplement: c3ta14491g.pdf [file c3ta14491g.pdf]

**Electronic Supplementary Information**

**Fabrication of magnetically responsive core-shell adsorbents for thiophene capture: AgNO<sub>3</sub>-functionalized Fe<sub>3</sub>O<sub>4</sub>@mesoporous SiO<sub>2</sub> microspheres**

**Peng Tan, Ju-Xiang Qin, Xiao-Qin Liu,\* Xiao-Qian Yin and Lin-Bin Sun\***

*State Key Laboratory of Materials-Oriented Chemical Engineering, College of Chemistry and Chemical Engineering, Nanjing Tech University, Nanjing 210009, China.*

*E-mail: liuxq@njtech.edu.cn; lbsun@njtech.edu.cn.*

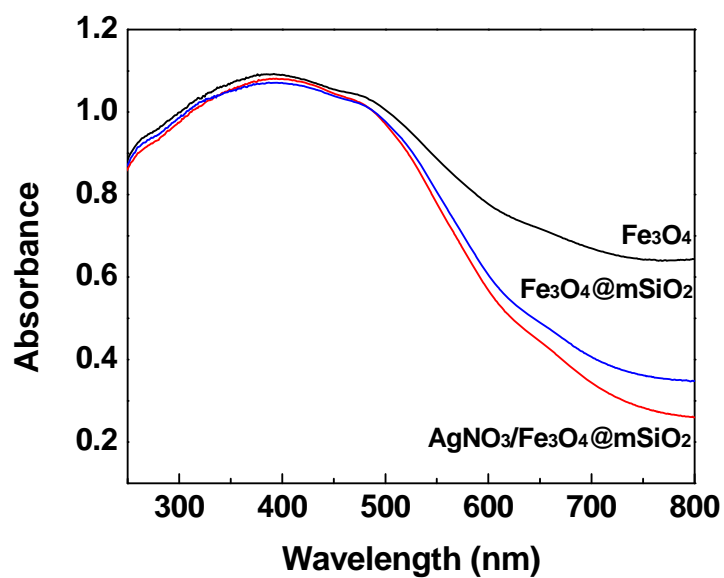

**Figure S1.** Diffuse reflectance UV-vis spectra of Fe<sub>3</sub>O<sub>4</sub> particles, Fe<sub>3</sub>O<sub>4</sub>@mSiO<sub>2</sub> microspheres, and AgNO<sub>3</sub>/Fe<sub>3</sub>O<sub>4</sub>@mSiO<sub>2</sub> microspheres.

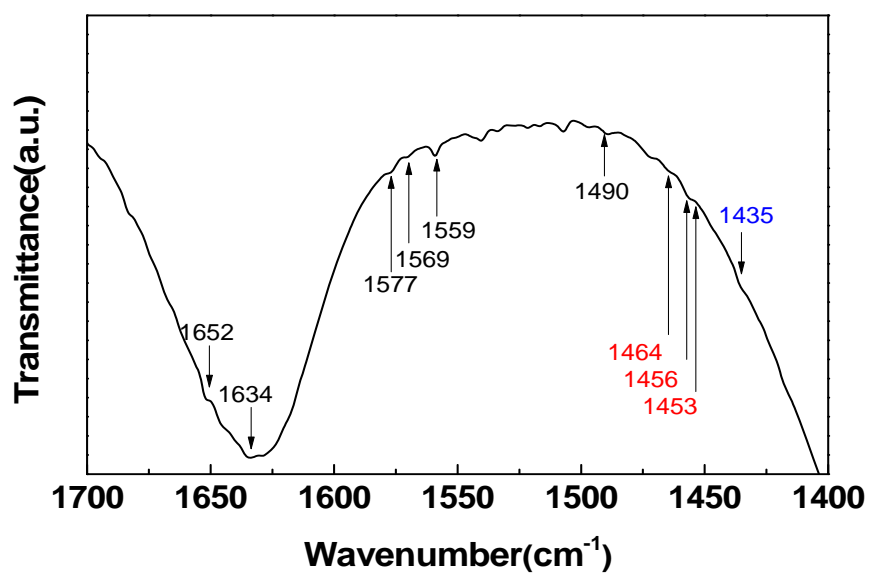

**Figure S2.** IR spectrum of AgNO<sub>3</sub>/Fe<sub>3</sub>O<sub>4</sub>@mSiO<sub>2</sub> microspheres after adsorption with thiophene.
